# Supplementary material
Source: publisher figshare collection journal article supplement (https://sage.figshare.com/ndownloader/files/14452562)
Supplement: Supplementary file 1 [file 14452562]

**Supplementary Table 2.** Univariate analysis of prognostic factors affecting overall survival.

|                                                   | All<br>HR (95% CI)      | pCCA<br>HR (95% CI)     | dCCA<br>HR (95% CI)      |
|---------------------------------------------------|-------------------------|-------------------------|--------------------------|
| Age                                               |                         |                         |                          |
| ≤65 years                                         | reference               | reference               | reference                |
| >65 years                                         | 1.66 (0.94–2.93)        | <b>2.45 (1.07–5.64)</b> | 1.45 (0.65–3.23)         |
| pCCA                                              | reference               | -                       | -                        |
| dCCA                                              | 0.89 (0.52–1.53)        |                         |                          |
| Male                                              | reference               | reference               | reference                |
| Female                                            | 0.81 (0.46–1.46)        | 0.67 (0.30–1.52)        | 0.95 (0.41–2.17)         |
| PSC                                               | 0.65 (0.28–1.53)        | 0.99 (0.29–3.33)        | 0.50 (0.15–1.67)         |
| Asymptomatic/incidental diagnosis                 | 0.65 (0.23–1.80)        | 0.97 (0.33–2.85)        | 0.040 (0.00005–33.64)    |
| Preoperative CA19-9                               |                         |                         |                          |
| ≤30 U/mL                                          | reference               | reference               | reference                |
| >30 U/mL                                          | 1.49 (0.86–2.60)        | 0.54 (0.25–1.19)        | <b>3.85 (1.66–8.94)</b>  |
| Preoperative ERCP                                 | 0.65 (0.23–1.80)        | 0.90 (0.27–3.03)        | 0.31 (0.04–2.41)         |
| Preoperative PTC                                  | 1.07 (0.45–2.50)        | 0.94 (0.37–2.35)        | -                        |
| Vascular resection                                | 1.20 (0.62–2.35)        | 1.39 (0.60–3.24)        | 0.90 (0.27–3.05)         |
| Re-resection of bile duct based on frozen section | 0.75 (0.41–1.37)        | 1.27 (0.48–3.40)        | 0.59 (0.27–1.29)         |
| Complications, Clavien-Dindo grade                |                         |                         |                          |
| No complications                                  | reference               | reference               | reference                |
| Grade 1–2                                         | 1.63 (0.77–3.45)        | 1.31 (0.53–3.28)        | 3.51 (0.70–17.58)        |
| Grade 3                                           | 1.78 (0.72–4.37)        | 2.37 (0.59–9.48)        | 3.40 (0.66–17.52)        |
| Grade 4                                           | 1.33 (0.45–3.90)        | 0.59 (0.12–2.90)        | 4.52 (0.68–30.00)        |
| R category                                        |                         |                         |                          |
| R0                                                | reference               | reference               | reference                |
| R1                                                | <b>1.76 (1.03–3.03)</b> | 1.26 (0.58–2.77)        | <b>2.79 (1.20–6.46)</b>  |
| T category                                        |                         |                         |                          |
| T1                                                | reference               | reference               | reference                |
| T2                                                | 2.83 (0.98–8.20)        | 1.70 (0.48–6.03)        | 6.86 (0.84–56.00)        |
| T3                                                | 2.23 (0.74–6.81)        | 0.54 (0.11–2.71)        | <b>8.10 (1.02–64.17)</b> |
| T4                                                | 3.93 (0.85–18.13)       | 2.37 (0.23–24.57)       | 10.96 (0.93–129.00)      |

|                                                 | <b>All<br/>HR (95% CI)</b> | <b>pCCA<br/>HR (95% CI)</b> | <b>dCCA<br/>HR (95% CI)</b> |
|-------------------------------------------------|----------------------------|-----------------------------|-----------------------------|
| N category                                      |                            |                             |                             |
| N0                                              | reference                  | reference                   | <b>reference</b>            |
| N1                                              | <b>2.61 (1.45–4.70)</b>    | 1.42 (0.63–3.18)            | <b>5.26 (1.91–14.49)</b>    |
| Metastatic / harvested<br>lymph node ratio >0.2 | 1.58 (0.86–2.90)           | 1.06 (0.45–2.50)            | 2.22 (0.89–5.5)             |

pCCA: perihilar cholangiocarcinoma, dCCA: distal cholangiocarcinoma, HR: hazard ratio, CI: confidence interval, ERCP: endoscopic retrograde cholangiopancreatography, PSC: primary sclerosing cholangitis, PTC: percutaneous transhepatic cholangiography.
